# Supplementary material for: The γ → β phase-transition behavior of polyvinylidene fluoride under uniaxial drawing
Source: Royal Society of Chemistry journal article supplement (doi:10.1039/d3ce00691c), 2023-01-01
Supplement: d3ce00691c1.pdf [file d3ce00691c1.pdf]

**Supplementary Material for**  
**The  $\gamma \rightarrow \beta$  phase transition behavior of polyvinylidene fluoride under**  
**uniaxial drawing**

Mengting Feng<sup>1#</sup>, Ruru Wan<sup>1#</sup>, Jian Hu<sup>2</sup>, Huihui Li<sup>1</sup>, Shaojuan Wang<sup>2</sup>, Shouke Yan,<sup>1</sup>

<sup>2\*</sup> Xiaoli Sun<sup>1\*</sup>

<sup>1</sup> State Key Laboratory of Chemical Resource Engineering, Beijing University of  
Chemical Technology, North Third Ring Road 15, Beijing, 100029, China  
(xiaolisun@mail.buct.edu.cn)

<sup>2</sup> Key Laboratory of Rubber-Plastics of Ministry of Education, Shandong Provincial  
Key Laboratory of Rubber-plastics, Qingdao University of Science & Technology,  
No.53 Zhengzhou Rd Qingdao 266042, China

<sup>#</sup> Mengting Feng and Ruru Wan contribute equally to the work.

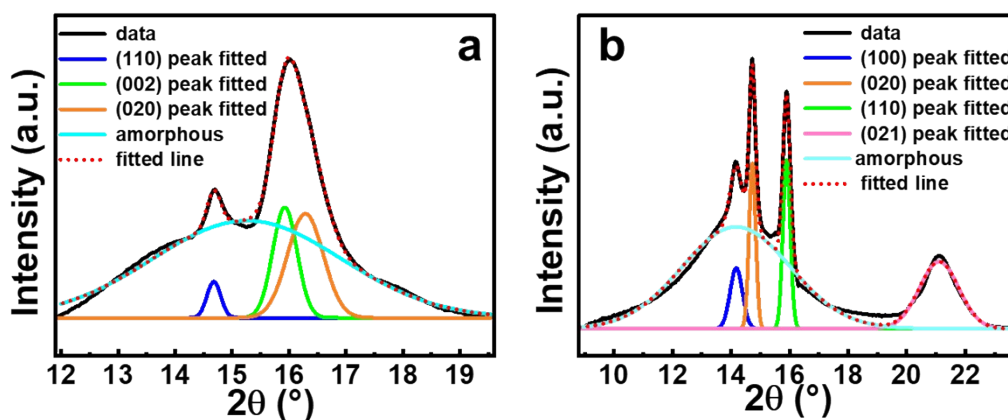

**Fig. S1** Curve-fitting analysis for the WAXD pattern of  $\gamma$ - (a) and  $\alpha$ -PVDF (b).

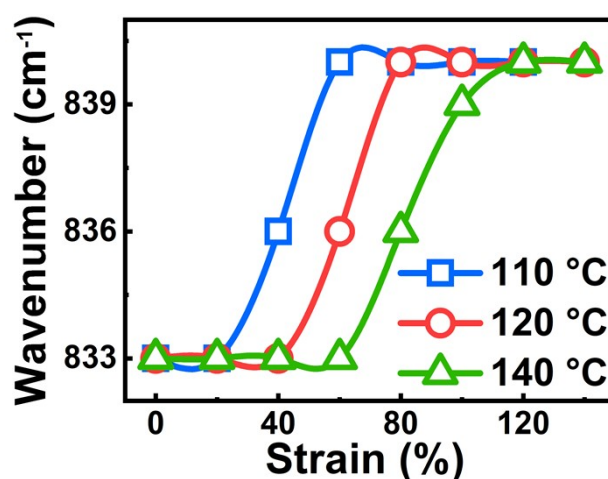

**Fig. S2** The shift of infrared band at  $833 \text{ cm}^{-1}$  for  $\gamma$ -PVDF crystals to  $840 \text{ cm}^{-1}$  for  $\beta$ -PVDF crystals against strain during stretching at different temperatures with a stretching rate of  $900 \mu\text{m/s}$ .

Fig. S2 shows the shift of infrared band from  $833 \text{ cm}^{-1}$  for  $\gamma$  phase to  $840 \text{ cm}^{-1}$  for  $\beta$  phase under stretching at different temperature with a stretching rate of  $900 \mu\text{m/s}$ , indicating the occurrence of  $\gamma$ - $\beta$  transition. In addition, it was found that the efficiency stretching temperature of obtaining  $\beta$  phase is  $110 \text{ }^\circ\text{C}$ .

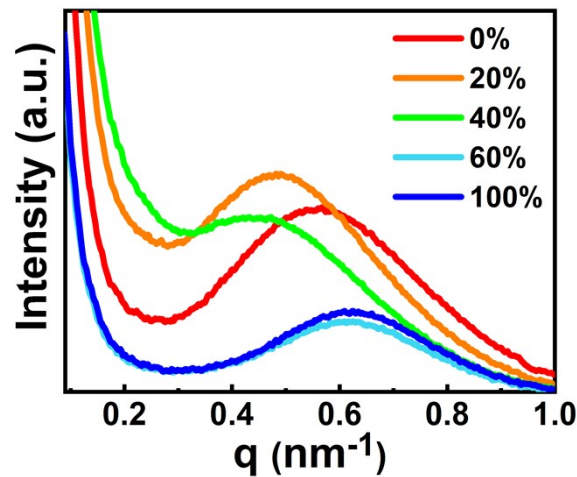

**Fig. S3** 1D SAXS profiles obtained along stretching direction corresponding to Fig. 5a.

1D SAXS profiles obtained along stretching direction of  $\gamma$ -PVDF sample at 110 °C with a stretching rate of 900  $\mu\text{m/s}$  corresponding to Fig. 5a shown in Fig. S3. When the  $\epsilon \leq 40\%$ , the peak position shifts toward the lower  $q$  value during stretching, which may be caused by the increase in interlamellar distance and lamellar thickness under stretching. With further stretching, the peak position shifts to the higher  $q$  value, indicating that the destruction of lamellae due to the applied force.

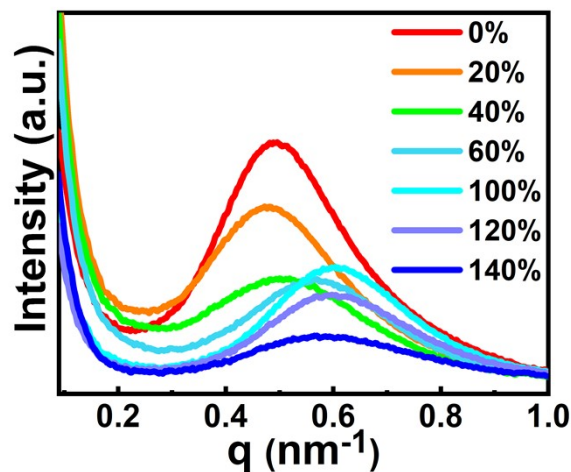

**Fig. S4** 1D SAXS profiles obtained along stretching direction corresponding to Fig. 7a.

Fig. S4 presents the 1D SAXS profiles obtained along stretching direction of  $\alpha$ -PVDF sample at 110 °C with a stretching rate of 900  $\mu\text{m/s}$  corresponding to Fig. 7a. With increase of stretching ratio, the peak position continuously shifts to larger  $q$  value at  $\varepsilon \leq 100\%$ , and then remains essentially unchanged with further stretching, suggesting that the decrease of  $l_{ac}$  caused by thinning of the crystalline lamellae and the amorphous region resulting from the fragmentation of original lamellae into crystallites.
